# Supplementary material
Source: publisher site journal article supplement (https://www.dovepress.com/get_supplementary_file.php?f=239850.docx)
Supplement: Supplementary file 1 [file get_supplementary_file.php]

**Supplementary Table 1. PCR primer pairs**

| **Targeted gene** | **Forward primer sequence** | **Reverse primer sequence** | **Product size（bp）** |
| --- | --- | --- | --- |
| sigA(MAB_3009) | AGCGTGAGCTGCTACAGGAC | TGGATTTCCAGCACCTTCTC | 98 |
| MAB_3508c (*whiB7*) | CCTGTGGTTCGCGGAAA | CCCTGCTCAAGAATCTCACC | 144 |
| *erm*(41) | CTCAGGGGAGTTCGTTGTGG | CCGCTATCCGGACATCTTCC | 155 |
| MAB_1409c | GTCCTGGTCCAATTCTCGCA | TCGCCACAACTCTGGTCATC | 199 |
| MAB_1846 | CCCACCAACAACCTGGACTT | ATTACCGGATCGGGTCTCCA | 149 |
| MAB_3142c | GTGAGAGTGAAGAGCACCCC | GCTGCTGATCGCCTTCCTAT | 135 |
| MAB_2807 | TCATTCTCTGGGAATCGCGG | GACAAGGGTCACCATCAGGG | 125 |
| MAB_0970c | CGCGCGTAAGGAAATTGGAG | TCACCCTCATCGTGCAGAAC | 126 |
| MAB_1560 | AACGTCTGGGAGGTCGTTTC | CGAAACATATGCCCGCGAAG | 84 |
| MAB_2736 | GCTGCTTTTCCATCTCGCTG | GTCCCGGATTGGCGAAATTG | 128 |
| MAB_2355c | CTGGCCAGCTCATACGGAAT | ACTCATGGAGTGCGACAGTG | 144 |

**Supplementary Table2. Mutations in the CLA target site genes and *erm*(41) of clinical *M. abscessus* isolatesa**

| **Isolate ID** | **Subspeciesb** | **CLA-sensitivity phenotypec** | **23S rRNA(*rrl*)** | ***erm*(41)** | ***rplC*** | ***rplD*** | ***rplV*** |
| --- | --- | --- | --- | --- | --- | --- | --- |
|
| A8 | A | S | 0 | 0 | 0 | 0 | 0 |
| A10 | A | S | 0 | 0 | 0 | 0 | 0 |
| A25 | A | S | 0 | 0 | 0 | 0 | 0 |
| A35 | A | S | 3042:C>T | 0 | 0 | 0 | 0 |
| A38 | A | S | 0 | 0 | 0 | 0 | 0 |
| A39 | M | S | 109:C>T|633:C>T|1717:A>G|3001:T>C | 13:P>Q|15:T>A|27:C>F|29:L>F|35:G>E|40:T>A|53:H>L|63:A>T | 0 | 142:G>A | 0 |
| A40 | A | I | 437:A>G|838:T>- | 0 | 0 | 0 | 0 |
| A49 | A | S | 0 | 0 | 0 | 0 | 0 |
| A51 | A | S | 0 | 0 | 0 | 0 | 0 |
| A54 | A | S | 0 | 0 | 54:T>A | 0 | 0 |
| A58 | A | S | 0 | 0 | 0 | 0 | 0 |
| A59 | A | S | 0 | 0 | 0 | 0 | 0 |
| A63 | M | S | 633:C>T|1717:A>G|3001:T>C | 13:P>Q|15:T>A|27:C>F|29:L>F|35:G>E|40:T>A|53:H>L|63:A>T | 0 | 142:G>A|175:A>P | 0 |
| A69 | A | S | 15:G>A | 0 | 0 | 0 | 0 |
| A73 | A | S | 0 | 0 | 0 | 0 | 0 |
| A79 | A | S | 0 | 0 | 0 | 0 | 0 |
| A126 | A | S | 3094:C>A |  | 0 | 0 | 0 |
| A137 | A | S | 0 | 0 | 0 | 0 | 0 |
| A173 | M | S | 109:C>T|633:C>T|1717:A>G|3001:T>C | 13:P>Q|15:T>A|27:C>F|29:L>F|35:G>E|40:T>A|53:H>L|63:A>T | 0 | 142:G>A | 0 |
| A175 | A | S | 0 | 0 | 0 | 142:G>A | 0 |
| A176 | A | S | 3042:C>T | 0 | 0 | 0 | 0 |
| A182 | A | S | 0 | 0 | 0 | 0 | 0 |
| A183 | A | S | 0 |  | 0 | 0 | 0 |
| A186 | M | S | 633:C>T|1717:A>G|3001:T>C | 13:P>Q|15:T>A|27:C>F|29:L>F|35:G>E|40:T>A|53:H>L|63:A>T | 0 | 142:G>A|175:A>P | 0 |
| A189 | A | S | 0 | 0 | 0 | 0 | 0 |
| A197 | A | S | 0 | 0 | 0 | 0 | 0 |
| A205 | M | S | 109:C>T|399:G>A|633:C>T|1717:A>G|3001:T>C | 13:P>Q|15:T>A|27:C>F|29:L>F|35:G>E|40:T>A|53:H>L | 0 | 142:G>A | 0 |
| A213 | A | S | 0 | 0 | 0 | 0 | 0 |
| A215 | A | S | 0 | 0 | 0 | 0 | 0 |
| A217 | A | S | 0 | 0 | 0 | 0 | 0 |
| A218 | A | S | 0 | 0 | 0 | 0 | 0 |
| A222 | M | S | 109:C>T|633:C>T|1717:A>G|3001:T>C | 13:P>Q|15:T>A|27:C>F|29:L>F|35:G>E|40:T>A|53:H>L|63:A>T | 0 | 142:G>A | 0 |
| A228 | M | S | 109:C>T|399:G>A|633:C>T|1717:A>G|3001:T>C | 13:P>Q|15:T>A|27:C>F|29:L>F|35:G>E|40:T>A|53:H>L | 0 | 142:G>A | 0 |
| A232 | A | R | 437:A>G|838:T>- | 0 | 0 | 0 | 0 |
| A233 | A | R | 2270:A>C|3042:C>T | 0 | 0 | 0 | 0 |
| A243 | A | S | 0 | 0 | 0 | 0 | 0 |
| A244 | A | S | 0 | 0 | 0 | 0 | 0 |
| A247 | M | S | 633:C>T|742:C>T|1613:C>A|1717:A>G|3001:T>C | 13:P>Q|15:T>A|27:C>F|29:L>F|35:G>E|40:T>A|53:H>L | 0 | 142:G>A | 0 |
| A249 | A | S | 0 | 0 | 0 | 0 | 0 |
| A254 | M | R | 109:C>T|633:C>T|1717:A>G|2271:A>C|3001:T>C | 13:P>Q|15:T>A|27:C>F|29:L>F|35:G>E|40:T>A|53:H>L|63:A>V | 0 | 142:G>A | 0 |
| A255 | A | S | 0 | 0 | 0 | 0 | 0 |
| A266 | A | S | 0 | 0 | 0 | 0 | 0 |
| A267 | M | R | 633:C>T|1717:A>G|2270:A>C|3001:T>C | 13:P>Q|15:T>A|27:C>F|29:L>F|35:G>E|40:T>A|53:H>L|63:A>T | 0 | 142:G>A|175:A>P | 0 |
| A268 | M | S | 109:C>T|399:G>A|633:C>T|1717:A>G|3001:T>C | 13:P>Q|15:T>A|27:C>F|29:L>F|35:G>E|40:T>A|53:H>L | 0 | 142:G>A | 0 |
| A274 | A | S | 684:C>T | 0 | 0 | 0 | 0 |
| A289 | M | S | 633:C>T|1717:A>G|3001:T>C | 13:P>Q|15:T>A|27:C>F|29:L>F|35:G>E|40:T>A|53:H>L|63:A>T | 0 | 142:G>A|175:A>P | 0 |
| A295 | M | R | 633:C>T|1717:A>G|2270:A>C|3001:T>C | 13:P>Q|15:T>A|27:C>F|29:L>F|35:G>E|40:T>A|53:H>L|63:A>T | 0 | 142:G>A|175:A>P | 0 |
| A297 | A | S | 0 | 0 | 0 | 0 | 0 |
| A305 | A | S | 0 | 0 | 0 | 0 | 0 |
| A311 | A | R | 0 | 0 | 0 | 0 | 0 |
| A312 | A | S | 0 | 0 | 0 | 0 | 0 |
| A315 | A | I | 640:->G | 0 | 0 | 0 | 0 |
| A317 | A | S | 3042:C>T | 0 | 0 | 0 | 0 |
| A321 | A | S | 0 | 0 | 0 | 0 | 0 |
| A323 | M | S | 633:C>T|1717:A>G|3001:T>C | 13:P>Q|15:T>A|27:C>F|29:L>F|35:G>E|40:T>A|53:H>L|63:A>T | 0 | 142:G>A|175:A>P | 0 |
| A329 | A | S | 109:C>T|331:C>T|348:G>A|633:C>T | 103:Q>H | 0 | 0 | 0 |
| A330 | A | S | 0 | 0 | 0 | 0 | 0 |
| A337 | A | S | 0 | 0 | 0 | 0 | 0 |
| A350 | A | S | 0 | 0 | 0 | 0 | 0 |
| A353 | A | R | 0 | 0 | 0 | 0 | 0 |
| 129 | A | S | 3042:C>T | 0 | 0 | 0 | 0 |
| G70 | A | S | 0 | 0 | 0 | 0 | 0 |
| 3 | A | S | 1445:C>T|2138:T>C|3048:G>A | 0 | 0 | 0 | 0 |
| G72 | A | R | 3042:C>T | 0 | 0 | 0 | 0 |
| G73 | A | I | 0 | 0 | 0 | 0 | 0 |
| G74 | M | S | 109:C>T|633:C>T|1717:A>G|3001:T>C | 0 | 0 | 142:G>A | 0 |
| G75 | M | S | 0 | 0 | 0 | 142:G>A | 0 |
| G76 | A | S | 3042:C>T | 0 | 0 | 0 | 0 |
| G77 | M | S | 633:C>T|1717:A>G|3001:T>C | 13:P>Q|15:T>A|27:C>F|29:L>F|35:G>E|40:T>A|53:H>L|63:A>T | 0 | 142:G>A|175:A>P | 0 |
| G78 | A | S | 437:A>G | 0 | 0 | 0 | 0 |
| G79 | A | S | 0 | 0 | 0 | 0 | 0 |
| 2 | A | S | 0 | 0 | 0 | 0 | 0 |
| G82 | A | S | 0 | 0 | 0 | 0 | 0 |
| G84 | A | S | 0 | 0 | 0 | 0 | 0 |
| G85 | M | S | 633:C>T|1717:A>G|3001:T>C | 13:P>Q|15:T>A|27:C>F|29:L>F|35:G>E|40:T>A|53:H>L|63:A>T | 0 | 142:G>A|175:A>P | 0 |
| G86 | A | S | 0 | 0 | 0 | 0 | 0 |
| G87 | M | S | 109:C>T|633:C>T|1717:A>G|3001:T>C | 13:P>Q|15:T>A|27:C>F|29:L>F|35:G>E|40:T>A|53:H>L|63:A>T | 0 | 142:G>A | 0 |
| G88 | M | S | 633:C>T|1717:A>G|3001:T>C | 13:P>Q|15:T>A|27:C>F|29:L>F|35:G>E|40:T>A|53:H>L|63:A>T | 0 | 142:G>A|175:A>P | 0 |
| G89 | A | S | 3042:C>T | 0 | 0 | 0 | 0 |
| G90 | A | S | 0 | 0 | 0 | 0 | 0 |
| G91 | A | S | 0 | 0 | 0 | 0 | 0 |
| G93 | A | S | 3042:C>T | 0 | 0 | 0 | 0 |
| G94 | A | S | 0 | 0 | 0 | 0 | 0 |
| G95 | M | S | 633:C>T|1717:A>G|3001:T>C | 13:P>Q|15:T>A|27:C>F|29:L>F|35:G>E|40:T>A|53:H>L|63:A>T | 0 | 142:G>A|175:A>P | 0 |
| G98 | M | S | 633:C>T|1717:A>G|3001:T>C | 13:P>Q|15:T>A|27:C>F|29:L>F|35:G>E|40:T>A|53:H>L|63:A>T | 0 | 142:G>A|175:A>P | 0 |
| G99 | A | S | 0 | 0 | 0 | 0 | 0 |
| 289 | A | S | 0 | 0 | 0 | 0 | 0 |
| G101 | M | S | 633:C>T|1717:A>G|3001:T>C | 13:P>Q|15:T>A|27:C>F|29:L>F|35:G>E|40:T>A|53:H>L|63:A>T | 0 | 142:G>A|175:A>P | 0 |
| G102 | A | S | 3042:C>T | 0 | 0 | 0 | 0 |
| G103 | A | S | 0 | 0 | 0 | 0 | 0 |
| G104 | A | S | 0 | 0 | 0 | 0 | 0 |
| G105 | M | S | 109:C>T|399:G>A|633:C>T|1717:A>G|3001:T>C | 13:P>Q|15:T>A|27:C>F|29:L>F|35:G>E|40:T>A|53:H>L | 0 | 142:G>A | 0 |
| G106 | A | S | 0 | 0 | 0 | 0 | 0 |
| G107 | M | S | 633:C>T|1717:A>G|3001:T>C | 13:P>Q|15:T>A|27:C>F|29:L>F|35:G>E|40:T>A|53:H>L|63:A>T | 0 | 142:G>A|175:A>P | 0 |
| G108 | M | S | 0 | 13:P>Q|15:T>A|27:C>F|29:L>F|35:G>E|40:T>A|53:H>L|63:A>T | 0 | 142:G>A | 0 |
| G109 | A | S | 0 | 0 | 0 | 0 | 0 |
| G110 | M | S | 633:C>T|1717:A>G|2269:A>C|3001:T>C | 13:P>Q|15:T>A|27:C>F|29:L>F|35:G>E|40:T>A|53:H>L|63:A>T | 0 | 142:G>A|175:A>P | 0 |
| G111 | A | S | 0 | 0 | 0 | 0 | 0 |
| G112 | A | I | 0 | 0 | 0 | 0 | 0 |
| G113 | A | S | 0 | 103:Q>H | 0 | 0 | 0 |
| G114 | A | S | 0 | 0 | 0 | 0 | 0 |
| G115 | A | S | 363:->A | 0 | 0 | 0 | 0 |
| G116 | M | S | 633:C>T|1717:A>G|3001:T>C | 13:P>Q|15:T>A|27:C>F|29:L>F|35:G>E|40:T>A|53:H>L|63:A>T | 0 | 142:G>A|175:A>P | 0 |
| G117 | A | S | 0 | 0 | 0 | 0 | 0 |
| G118 | A | S | 0 | 0 | 0 | 0 | 0 |
| G119 | A | S | 0 | 0 | 0 | 0 | 0 |
| G120 | A | S | 0 | 0 | 0 | 0 | 0 |
| G121 | A | S | 0 | 0 | 0 | 0 | 0 |
| G122 | A | I | 0 | 0 | 0 | 0 | 0 |
| G123 | A | S | 0 | 0 | 0 | 0 | 0 |
| G124 | M | S | 109:C>T|399:G>A|633:C>T|1717:A>G|3001:T>C | 13:P>Q|15:T>A|27:C>F|29:L>F|35:G>E|40:T>A|53:H>L | 0 | 142:G>A | 0 |
| G125 | A | S | 0 | 0 | 0 | 0 | 0 |
| G126 | M | S | 109:C>T|633:C>T|1717:A>G|3001:T>C | 13:P>Q|15:T>A|27:C>F|29:L>F|35:G>E|40:T>A|53:H>L|63:A>T | 0 | 142:G>A | 0 |
| G127 | A | S | 0 | 0 | 0 | 0 | 0 |
| G128 | A | S | 3042:C>T | 0 | 0 | 0 | 0 |
| G129 | A | S | 0 | 0 | 0 | 0 | 0 |
| G132 | A | S | 0 | 0 | 0 | 0 | 0 |
| G133 | A | S | 0 | 0 | 0 | 0 | 0 |
| G134 | A | S | 0 | 0 | 0 | 0 | 0 |
| G135 | M | S | 633:C>T|1717:A>G|3001:T>C | 13:P>Q|15:T>A|27:C>F|29:L>F|35:G>E|40:T>A|53:H>L | 0 | 142:G>A | 0 |
| G136 | A | S | 1422:G>A | 0 | 0 | 0 | 0 |
| G137 | M | S | 109:C>T|399:G>A|633:C>T|1717:A>G|1925:C>T|3001:T>C | 13:P>Q|15:T>A|27:C>F|29:L>F|35:G>E|40:T>A|53:H>L | 0 | 142:G>A | 0 |
| G138 | M | S | 633:C>T|1717:A>G|3001:T>C | 0 | 0 | 142:G>A|175:A>P | 0 |
| G139 | A | S | 3042:C>T | 0 | 0 | 0 | 0 |
| G140 | A | S | 3042:C>T | 0 | 0 | 0 | 0 |
| G141 | M | S | 633:C>T|1717:A>G|3001:T>C | 13:P>Q|15:T>A|27:C>F|29:L>F|35:G>E|40:T>A|53:H>L|63:A>T | 0 | 142:G>A|175:A>P | 0 |
| G142 | A | S | 0 | 0 | 0 | 0 | 0 |
| G143 | A | S | 0 | 0 | 0 | 0 | 0 |
| G144 | A | S | 0 | 0 | 0 | 0 | 0 |
| G145 | A | S | 0 | 0 | 0 | 0 | 0 |
| G146 | A | S | 3042:C>T | 0 | 0 | 0 | 0 |
| G147 | M | S | 633:C>T|1717:A>G|3001:T>C | 13:P>Q|15:T>A|27:C>F|29:L>F|35:G>E|40:T>A|53:H>L|63:A>T | 0 | 142:G>A|175:A>P | 0 |
| G148 | A | S | 0 | 0 | 0 | 0 | 0 |
| G149 | A | S | 0 | 0 | 0 | 0 | 0 |
| G150 | A | S | 0 | 0 | 0 | 0 | 0 |
| G151 | A | S | 0 | 0 | 0 | 0 | 0 |
| G152 | A | S | 0 | 0 | 0 | 0 | 0 |
| G153 | M | S | 633:C>T|1717:A>G|3001:T>C | 0 | 0 | 142:G>A|175:A>P | 0 |
| G155 | A | S | 3042:C>T | 0 | 0 | 0 | 0 |
| G156 | M | S | 633:C>T|1717:A>G|3001:T>C | 0 | 0 | 142:G>A|175:A>P | 0 |
| G157 | M | S | 633:C>T|1717:A>G|3001:T>C | 0 | 0 | 142:G>A|175:A>P | 0 |
| G158 | A | S | 0 | 0 | 0 | 0 | 0 |
| G159 | A | S | 0 | 0 | 0 | 0 | 0 |
| G160 | A | S | 0 | 0 | 0 | 0 | 0 |
| G161 | A | S | 0 | 0 | 0 | 0 | 0 |
| G162 | A | S | 0 | 0 | 0 | 0 | 0 |
| G163 | A | S | 0 | 0 | 0 | 0 | 0 |
| G164 | A | I | 0 | 0 | 0 | 0 | 0 |
| G165 | A | S | 0 | 0 | 0 | 0 | 0 |
| G169 | A | S | 0 | 0 | 0 | 0 | 0 |
| G170 | A | S | 0 | 0 | 0 | 0 | 0 |
| G172 | A | S | 0 | 0 | 0 | 0 | 0 |
| G173 | M | S | 633:C>T|742:C>T|1717:A>G|3001:T>C | 0 | 0 | 142:G>A | 0 |
| G174 | A | S | 0 | 0 | 0 | 0 | 0 |
| G175 | A | S | 2432:C>T | 0 | 0 | 0 | 0 |
| G176 | A | R | 2270:A>C | 0 | 0 | 0 | 0 |
| G177 | A | S | 1582:C>A | 0 | 0 | 0 | 0 |
| G178 | A | S | 0 | 0 | 0 | 0 | 0 |
| G179 | A | S | 0 | 0 | 0 | 0 | 0 |
| G180 | A | R | 2270:A>C | 0 | 0 | 0 | 0 |
| G181 | A | S | 0 | 0 | 0 | 0 | 0 |
| G182 | A | S | 0 | 0 | 0 | 0 | 0 |
| G183 | A | S | 0 | 0 | 0 | 0 | 0 |
| G184 | A | S | 328:T>C|3042:C>T | 0 | 0 | 0 | 0 |
| G185 | A | S | 0 | 0 | 0 | 0 | 0 |
| G186 | A | R | 2271:A>G | 0 | 0 | 0 | 0 |
| G187 | A | S | 0 | 0 | 0 | 0 | 0 |
| G188 | M | R | 633:C>T|1717:A>G|3001:T>C | 0 | 0 | 142:G>A|175:A>P | 0 |
| G189 | M | S | 633:C>T|1717:A>G|3001:T>C | 0 | 0 | 142:G>A|175:A>P | 0 |
| G190 | M | R | 633:C>T|1717:A>G|3001:T>C | 0 | 0 | 142:G>A|175:A>P | 0 |
| G192 | A | S | 0 | 0 | 0 | 0 | 0 |
| G193 | A | S | 0 | 0 | 0 | 0 | 0 |
| G194 | A | S | 0 | 0 | 0 | 0 | 0 |
| G195 | A | S | 0 | 0 | 0 | 0 | 0 |
| G196 | A | S | 0 | 0 | 0 | 0 | 0 |
| G197 | A | S | 0 | 0 | 0 | 0 | 0 |
| G198 | A | S | 0 | 0 | 0 | 0 | 0 |
| G199 | M | S | 109:C>T|399:G>A|633:C>T|1717:A>G|3001:T>C | 13:P>Q|15:T>A|27:C>F|29:L>F|35:G>E|40:T>A|53:H>L | 0 | 142:G>A | 0 |
| G200 | A | S | 0 | 0 | 0 | 0 | 0 |
| G201 | A | S | 0 | 0 | 0 | 0 | 0 |
| G203 | M | S | 109:C>T|399:G>A|633:C>T|1717:A>G|3001:T>C | 13:P>Q|15:T>A|27:C>F|29:L>F|35:G>E|40:T>A|53:H>L | 0 | 142:G>A | 0 |
| G204 | A | S | 0 | 0 | 0 | 0 | 0 |
| G205 | A | S | 0 | 0 | 0 | 0 | 0 |
| G206 | A | S | 0 | 0 | 0 | 0 | 0 |
| G207 | M | S | 109:C>T|399:G>A|633:C>T|1717:A>G|3001:T>C | 13:P>Q|15:T>A|27:C>F|29:L>F|35:G>E|40:T>A|53:H>L | 0 | 142:G>A | 0 |
| G208 | A | S | 0 | 0 | 0 | 0 | 0 |
| G210 | A | S | 3042:C>T | 0 | 0 | 0 | 0 |
| G211 | A | S | 0 | 0 | 0 | 0 | 0 |
| G213 | A | S | 0 | 0 | 0 | 0 | 0 |
| G215 | A | S | 3042:C>T | 0 | 0 | 0 | 0 |
| G216 | A | S | 3042:C>T | 0 | 0 | 0 | 0 |
| G218 | A | S | 0 | 0 | 0 | 0 | 0 |
| G219 | A | S | 0 | 0 | 0 | 0 | 0 |
| G220 | M | S | 633:C>T|1717:A>G|3001:T>C | 13:P>Q|15:T>A|27:C>F|29:L>F|35:G>E|40:T>A|53:H>L|63:A>T | 0 | 142:G>A|175:A>P | 0 |

aRed indicates the mutation only occurs in CLA-insensitive (including both MIC-intermediate and -resistant) strains. Green indicates the mutation is present in both CLA-sensitive and insensitive strains. The shaded sections indicate the strain hasan *rrl_*2270/2271 (corresponding to *E. coli* 2058/2059) mutation.

bA: *abscessus*; M: *massiliense*.

cS: sensitive; I: intermediate; R: resistant.

**Supplementary Table 3.** **Correlation between MIC of clarithromycin and *rrl* mutations in resistant strains**

| ClarithromycinMIC (mg/L) | Isolate ID # | *M. abscessus*  subsp. | *rrl* mutation | |
| --- | --- | --- | --- | --- |
| Position 2270/2271 | Other position |
| 8 | A311 | *abscessus* | N* | N |
| G72 | *abscessus* | N | 3042:C>T |
| 16 | A353 | *abscessus* | N | N |
| 32 | A232 | *abscessus* | N | 437: A>G；838: T>- |
| 64 | A233 | *abscessus* | 2270: A>C | 3042:C>T |
| A254 | *massiliense* | 2271: A>C | N |
| A267 | *massiliense* | 2270: A>C | N |
| G186 | *abscessus* | 2271: A>G | N |
| 128 | G176 | *abscessus* | 2270: A>C | N |
| G180 | *abscessus* | 2270: A>C | N |
| G190 | *massiliense* | N | N |
| 256 | A295 | *massiliense* | 2270: A>C | N |
| G188 | *massiliense* | N | N |

*No single nucleotide polymorphism (SNP).
